# Supplementary material for: Analyzing networks of phenotypes in complex diseases: methodology and applications in COPD
Source: PubMed Central journal article supplement (PMC4105829; doi:10.1186/1752-0509-8-78), 2014-06-25

# Whole Population Network, $p < 0.001$

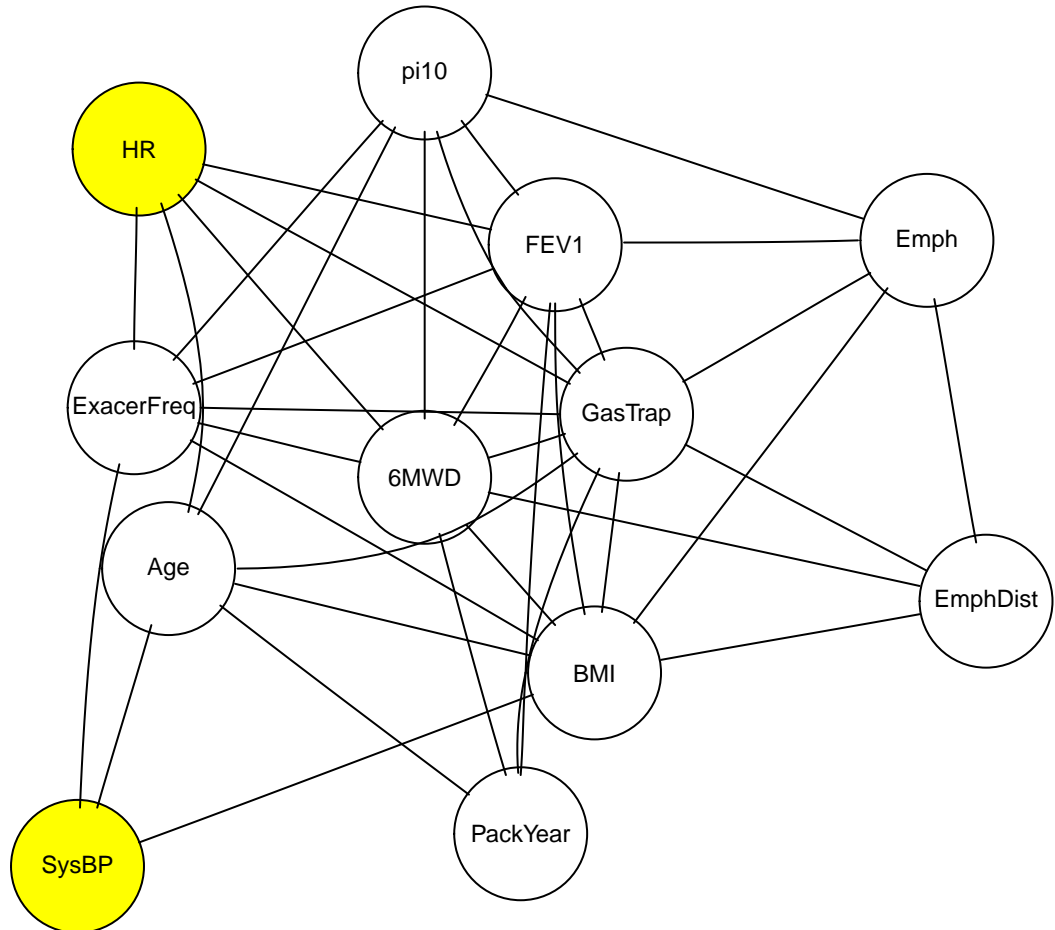

Supplement: 1752-0509-8-78-S1.pdf [file 1752-0509-8-78-S1.pdf]
