# Supplementary material for: Analyzing networks of phenotypes in complex diseases: methodology and applications in COPD
Source: PubMed Central journal article supplement (PMC4105829; doi:10.1186/1752-0509-8-78), 2014-06-25
Supplement: 1752-0509-8-78-S3.pdf [file 1752-0509-8-78-S3.pdf]

|    | Node 1                 | Node 2                 | Population P-value | 2 copies<br>COPD risk<br>allele p-value | 2 copies<br>COPD non-risk<br>allele p-value |
|----|------------------------|------------------------|--------------------|-----------------------------------------|---------------------------------------------|
| 1  | Emphysema              | Gas Trapping           | 0                  | 2.26E-239                               | 8.67E-107                                   |
| 2  | FEV1% pred             | Gas Trapping           | 1.88E-238          | 8.39E-82                                | 3.99E-31                                    |
| 3  | FEV1% pred             | Airway Wall Area       | 4.83E-193          | 8.30E-51                                | 5.16E-24                                    |
| 4  | Gas Trapping           | Age                    | 2.04E-102          | 1.63E-30                                | 2.32E-18                                    |
| 5  | FEV1% pred             | 6MWD                   | 7.47E-97           | 1.45E-25                                | 8.20E-14                                    |
| 6  | Gas Trapping           | BMI                    | 7.35E-73           | 6.29E-24                                | 2.00E-10                                    |
| 7  | 6MWD                   | BMI                    | 5.29E-64           | 3.88E-23                                | 1.57E-11                                    |
| 8  | Airway Wall Area       | 6MWD                   | 7.47E-63           | 8.20E-16                                | 0.0001                                      |
| 9  | Emphysema              | Airway Wall Area       | 6.49E-60           | 2.68E-11                                | 0.0001                                      |
| 10 | FEV1% pred             | Exacerbation Frequency | 2.66E-37           | 2.43E-09                                | 3.99E-10                                    |
| 11 | Age                    | Pack-years             | 4.00E-37           | 2.79E-11                                | 0.0003                                      |
| 12 | 6MWD                   | Pack-years             | 9.27E-33           | 1.01E-08                                | 0.0135                                      |
| 13 | 6MWD                   | Age                    | 2.22E-25           | 1.32E-08                                | 4.70E-06                                    |
| 14 | FEV1% pred             | Pack-years             | 4.86E-24           | 4.71E-07                                | 1.30E-07                                    |
| 15 | FEV1% pred             | BMI                    | 1.78E-16           | 5.82E-08                                | 0.0399                                      |
| 16 | FEV1% pred             | Age                    | 7.75E-12           | 0.0001                                  | 0.0040                                      |
| 17 | Exacerbation Frequency | 6MWD                   | 2.07E-11           | 0.0003                                  | 0.0916                                      |
| 18 | Emphysema              | Age                    | 7.17E-10           | 0.0185                                  | 0.0110                                      |
| 19 | FEV1% pred             | Emphysema              | 6.35E-07           | 6.35E-06                                | 0.0009                                      |
| 20 | Exacerbation Frequency | Age                    | 9.39E-07           | 0.0077                                  | 0.0079                                      |
| 21 | Emphysema              | Emphysema Distribution | 6.32E-06           | 0.0072                                  | 0.0003                                      |
| 22 | Emphysema              | BMI                    | 9.07E-06           | 0.0002                                  | 0.6357                                      |
| 23 | Airway Wall Area       | Exacerbation Frequency | 1.19E-05           | 0.0046                                  | 0.6228                                      |
| 24 | Emphysema Distribution | Gas Trapping           | 1.90E-05           | 0.0003                                  | 0.0378                                      |
| 25 | Gas Trapping           | Pack-years             | 2.86E-05           | 0.0134                                  | 0.6678                                      |
| 26 | Emphysema Distribution | 6MWD                   | 5.50E-05           | 0.0006                                  | 0.4296                                      |
| 27 | Emphysema              | Pack-years             | 0.0001             | 0.0388                                  | 0.9147                                      |
| 28 | BMI                    | Age                    | 0.0002             | 0.0536                                  | 0.6084                                      |
| 29 | Emphysema              | 6MWD                   | 0.0002             | 0.0041                                  | 0.8322                                      |
| 30 | Gas Trapping           | Exacerbation Frequency | 0.0015             | 0.0945                                  | 0.3691                                      |
| 31 | Gas Trapping           | Airway Wall Area       | 0.0015             | 0.1047                                  | 0.2591                                      |
| 32 | Emphysema Distribution | Age                    | 0.0035             | 0.0990                                  | 0.0654                                      |
| 33 | Airway Wall Area       | Pack-years             | 0.0046             | 0.3068                                  | 0.0595                                      |
| 34 | Emphysema Distribution | BMI                    | 0.0068             | 0.0001                                  | 0.0042                                      |
| 35 | FEV1% pred             | Emphysema Distribution | 0.0166             | 0.0133                                  | 0.7722                                      |
| 36 | BMI                    | Pack-years             | 0.0252             | 0.2597                                  | 0.1214                                      |
| 37 | Airway Wall Area       | BMI                    | 0.0315             | 0.1670                                  | 0.4113                                      |
| 38 | Exacerbation Frequency | BMI                    | 0.0967             | 0.0508                                  | 0.5064                                      |
| 39 | Exacerbation Frequency | Pack-years             | 0.1550             | 0.3038                                  | 0.1009                                      |
| 40 | Gas Trapping           | 6MWD                   | 0.2014             | 0.7065                                  | 0.1881                                      |
| 41 | Airway Wall Area       | Age                    | 0.2467             | 0.7821                                  | 0.8489                                      |
| 42 | Emphysema Distribution | Exacerbation Frequency | 0.3621             | 0.8236                                  | 0.2072                                      |
| 43 | Emphysema Distribution | Airway Wall Area       | 0.4888             | 0.9904                                  | 0.5390                                      |
| 44 | Emphysema              | Exacerbation Frequency | 0.7714             | 0.8116                                  | 0.0643                                      |
| 45 | Emphysema Distribution | Pack-years             | 0.8382             | 0.7588                                  | 0.0037                                      |

**Table S2:** p-values for all edges for non-Hispanic White (NHW) populations with 2 copies of COPD risk or COPD non-risk allele (HHIP)

|    | Node 1                 | Node 2                 | Population PCOR | 2 copies COPD risk allele PCOR | 2 copies COPD non-risk allele PCOR | 2 copies COPD risk allele perm p-value | 2 copies COPD non-risk allele perm p-value |
|----|------------------------|------------------------|-----------------|--------------------------------|------------------------------------|----------------------------------------|--------------------------------------------|
| 1  | Emphysema              | Gas Trapping           | 0.6541          | 0.6509                         | 0.6531                             | 0.5842                                 | 0.6892                                     |
| 2  | FEV1% pred             | Gas Trapping           | -0.3538         | -0.4113                        | -0.3793                            | 0.5802                                 | 0.4366                                     |
| 3  | FEV1% pred             | Airway Wall Area       | -0.3200         | -0.3275                        | -0.3335                            | 0.8898                                 | 0.696                                      |
| 4  | Gas Trapping           | Age                    | 0.2350          | 0.2538                         | 0.2905                             | 0.1864                                 | 0.2654                                     |
| 5  | FEV1% pred             | 6MWD                   | -0.2285         | 0.2316                         | 0.2496                             | 0.613                                  | 0.5914                                     |
| 6  | Gas Trapping           | BMI                    | -0.1982         | -0.2238                        | -0.2136                            | 0.7808                                 | 0.8606                                     |
| 7  | 6MWD                   | BMI                    | -0.1857         | -0.2199                        | -0.2261                            | 0.866                                  | 0.847                                      |
| 8  | Airway Wall Area       | 6MWD                   | 0.1840          | -0.1794                        | -0.1328                            | 0.2424                                 | 0.2424                                     |
| 9  | Emphysema              | Airway Wall Area       | 0.1796          | -0.1489                        | -0.1298                            | 0.5874                                 | 0.656                                      |
| 10 | FEV1% pred             | Exacerbation Frequency | -0.1408         | -0.1335                        | -0.2101                            | 0.0278                                 | 0.041                                      |
| 11 | Age                    | Pack-years             | -0.1405         | 0.1488                         | 0.1233                             | 0.3526                                 | 0.5706                                     |
| 12 | 6MWD                   | Pack-years             | -0.1316         | -0.1282                        | -0.0838                            | 0.2886                                 | 0.278                                      |
| 13 | 6MWD                   | Age                    | -0.1151         | -0.1272                        | -0.1546                            | 0.4474                                 | 0.4584                                     |
| 14 | FEV1% pred             | Pack-years             | -0.1118         | -0.1128                        | -0.1779                            | 0.0652                                 | 0.0996                                     |
| 15 | FEV1% pred             | BMI                    | -0.0911         | -0.1214                        | -0.0697                            | 0.2426                                 | 0.2466                                     |
| 16 | FEV1% pred             | Age                    | -0.0758         | 0.0885                         | 0.0974                             | 0.5864                                 | 0.7912                                     |
| 17 | Exacerbation Frequency | 6MWD                   | -0.0742         | -0.0813                        | -0.0573                            | 0.7072                                 | 0.547                                      |
| 18 | Emphysema              | Age                    | -0.0683         | -0.0529                        | -0.0862                            | 0.1892                                 | 0.3604                                     |
| 19 | FEV1% pred             | Emphysema              | 0.0552          | -0.1012                        | -0.1121                            | 0.958                                  | 0.8986                                     |
| 20 | Exacerbation Frequency | Age                    | -0.0543         | -0.0598                        | -0.0901                            | 0.3554                                 | 0.459                                      |
| 21 | Emphysema              | Emphysema Distribution | 0.0500          | 0.0603                         | 0.1229                             | 0.3166                                 | 0.0186                                     |
| 22 | Emphysema              | BMI                    | 0.0492          | -0.0837                        | -0.0161                            | 0.0546                                 | 0.0294                                     |
| 23 | Airway Wall Area       | Exacerbation Frequency | -0.0485         | 0.0636                         | 0.0167                             | 0.2218                                 | 0.2514                                     |
| 24 | Emphysema Distribution | Gas Trapping           | -0.0474         | -0.0815                        | -0.0705                            | 0.6964                                 | 0.829                                      |
| 25 | Gas Trapping           | Pack-years             | -0.0464         | 0.0555                         | 0.0146                             | 0.276                                  | 0.2576                                     |
| 26 | Emphysema Distribution | 6MWD                   | 0.0447          | -0.0767                        | -0.0268                            | 0.4116                                 | 0.0736                                     |
| 27 | Emphysema              | Pack-years             | 0.0427          | -0.0464                        | 0.0036                             | 0.2432                                 | 0.1262                                     |
| 28 | BMI                    | Age                    | -0.0419         | 0.0433                         | 0.0174                             | 0.6022                                 | 0.4714                                     |
| 29 | Emphysema              | 6MWD                   | 0.0408          | -0.0644                        | 0.0072                             | 0.1142                                 | 0.1188                                     |
| 30 | Gas Trapping           | Exacerbation Frequency | -0.0353         | 0.0376                         | 0.0305                             | 0.7038                                 | 0.8814                                     |
| 31 | Gas Trapping           | Airway Wall Area       | -0.0353         | -0.0364                        | -0.0383                            | 0.8808                                 | 0.9468                                     |
| 32 | Emphysema Distribution | Age                    | 0.0324          | -0.0371                        | -0.0625                            | 0.6276                                 | 0.5324                                     |
| 33 | Airway Wall Area       | Pack-years             | -0.0314         | -0.0230                        | -0.0640                            | 0.297                                  | 0.3234                                     |
| 34 | Emphysema Distribution | BMI                    | -0.0300         | -0.0873                        | -0.0969                            | 0.769                                  | 0.5812                                     |
| 35 | FEV1% pred             | Emphysema Distribution | 0.0266          | -0.0556                        | -0.0098                            | 0.5314                                 | 0.1176                                     |
| 36 | BMI                    | Pack-years             | 0.0248          | 0.0253                         | 0.0526                             | 0.6306                                 | 0.4378                                     |
| 37 | Airway Wall Area       | BMI                    | -0.0238         | -0.0310                        | 0.0279                             | 0.1736                                 | 0.7306                                     |
| 38 | Exacerbation Frequency | BMI                    | -0.0184         | 0.0439                         | -0.0226                            | 0.081                                  | 0.9112                                     |
| 39 | Exacerbation Frequency | Pack-years             | -0.0158         | -0.0231                        | 0.0557                             | 0.1422                                 | 0.1054                                     |
| 40 | Gas Trapping           | 6MWD                   | 0.0142          | -0.0085                        | -0.0447                            | 0.3652                                 | 0.3864                                     |
| 41 | Airway Wall Area       | Age                    | 0.0128          | -0.0062                        | -0.0065                            | 0.6826                                 | 0.3418                                     |
| 42 | Emphysema Distribution | Exacerbation Frequency | -0.0101         | -0.0050                        | 0.0428                             | 0.681                                  | 0.1796                                     |
| 43 | Emphysema Distribution | Airway Wall Area       | -0.0077         | 0.0003                         | 0.0209                             | 0.0236                                 | 0.8622                                     |
| 44 | Emphysema              | Exacerbation Frequency | 0.0032          | 0.0054                         | -0.0628                            | 0.4022                                 | 0.1948                                     |
| 45 | Emphysema Distribution | Pack-years             | -0.0023         | 0.0069                         | 0.0983                             | 0.1542                                 | 0.0184                                     |

**Table S2 (cont.):** partial correlations and permutation-based p-values for all edges for non-Hispanic White (NHW) populations with 2 copies of COPD risk or COPD non-risk allele (HHIP)
