# Supplementary material for: Analyzing networks of phenotypes in complex diseases: methodology and applications in COPD
Source: PubMed Central journal article supplement (PMC4105829; doi:10.1186/1752-0509-8-78), 2014-06-25
Supplement: 1752-0509-8-78-S4.pdf [file 1752-0509-8-78-S4.pdf]

|    | Node 1                 | Node 2                 | Population P-value | 2 copies COPD risk allele p-value | 2 copies COPD non-risk allele p-value |
|----|------------------------|------------------------|--------------------|-----------------------------------|---------------------------------------|
| 1  | Emphysema              | Gas Trapping           | 0                  | 2.75E-194                         | 3.27E-165                             |
| 2  | FEV1 %pred             | Gas Trapping           | 1.88E-238          | 1.51E-68                          | 3.55E-43                              |
| 3  | FEV1 %pred             | Airway Wall Area       | 4.83E-193          | 1.43E-36                          | 8.49E-29                              |
| 4  | Gas Trapping           | Age                    | 2.04E-102          | 1.98E-32                          | 2.15E-16                              |
| 5  | FEV1 %pred             | 6MWD                   | 7.47E-97           | 3.58E-19                          | 1.26E-18                              |
| 6  | Gas Trapping           | BMI                    | 7.35E-73           | 4.62E-15                          | 6.36E-11                              |
| 7  | 6MWD                   | BMI                    | 5.29E-64           | 2.62E-18                          | 4.54E-12                              |
| 8  | Airway Wall Area       | 6MWD                   | 7.47E-63           | 1.96E-08                          | 1.00E-08                              |
| 9  | Emphysema              | Airway Wall Area       | 6.49E-60           | 1.34E-06                          | 2.15E-08                              |
| 10 | FEV1 %pred             | Exacerbation Frequency | 2.66E-37           | 3.78E-08                          | 3.10E-07                              |
| 11 | Age                    | Pack-years             | 4.00E-37           | 0.0002                            | 5.79E-07                              |
| 12 | 6MWD                   | Pack-years             | 9.27E-33           | 2.26E-09                          | 0.0002                                |
| 13 | 6MWD                   | Age                    | 2.22E-25           | 1.01E-06                          | 3.26E-07                              |
| 14 | FEV1 %pred             | Pack-years             | 4.86E-24           | 0.0010                            | 1.06E-07                              |
| 15 | FEV1 %pred             | BMI                    | 1.78E-16           | 0.0019                            | 0.0003                                |
| 16 | FEV1 %pred             | Age                    | 7.75E-12           | 1.97E-05                          | 0.0091                                |
| 17 | Exacerbation Frequency | 6MWD                   | 2.07E-11           | 0.0002                            | 0.0009                                |
| 18 | Emphysema              | Age                    | 7.17E-10           | 9.36E-08                          | 0.1643                                |
| 19 | FEV1 %pred             | Emphysema              | 6.35E-07           | 0.8129                            | 9.98E-06                              |
| 20 | Exacerbation Frequency | Age                    | 9.39E-07           | 0.0013                            | 0.0008                                |
| 21 | Emphysema              | Emphysema Distribution | 6.32E-06           | 0.0034                            | 0.0050                                |
| 22 | Emphysema              | BMI                    | 9.07E-06           | 0.0807                            | 0.0099                                |
| 23 | Airway Wall Area       | Exacerbation Frequency | 1.19E-05           | 0.6975                            | 0.0002                                |
| 24 | Emphysema Distribution | Gas Trapping           | 1.90E-05           | 0.0265                            | 0.0072                                |
| 25 | Gas Trapping           | Pack-years             | 2.86E-05           | 0.0234                            | 0.0002                                |
| 26 | Emphysema Distribution | 6MWD                   | 5.50E-05           | 0.1449                            | 0.0185                                |
| 27 | Emphysema              | Pack-years             | 0.0001             | 0.0457                            | 0.0007                                |
| 28 | BMI                    | Age                    | 0.0002             | 0.6948                            | 0.9065                                |
| 29 | Emphysema              | 6MWD                   | 0.0002             | 0.1266                            | 0.0188                                |
| 30 | Gas Trapping           | Exacerbation Frequency | 0.0015             | 0.4982                            | 0.0003                                |
| 31 | Gas Trapping           | Airway Wall Area       | 0.0015             | 0.1315                            | 0.2047                                |
| 32 | Emphysema Distribution | Age                    | 0.0035             | 0.6610                            | 0.0830                                |
| 33 | Airway Wall Area       | Pack-years             | 0.0046             | 0.5833                            | 0.9392                                |
| 34 | Emphysema Distribution | BMI                    | 0.0068             | 0.0259                            | 0.0494                                |
| 35 | FEV1 %pred             | Emphysema Distribution | 0.0166             | 0.5650                            | 0.1842                                |
| 36 | BMI                    | Pack-years             | 0.0252             | 0.0117                            | 0.0653                                |
| 37 | Airway Wall Area       | BMI                    | 0.0315             | 0.6317                            | 0.1685                                |
| 38 | Exacerbation Frequency | BMI                    | 0.0967             | 0.4106                            | 0.7012                                |
| 39 | Exacerbation Frequency | Pack-years             | 0.1550             | 0.7941                            | 0.2046                                |
| 40 | Gas Trapping           | 6MWD                   | 0.2014             | 0.3027                            | 0.6971                                |
| 41 | Airway Wall Area       | Age                    | 0.2467             | 0.5873                            | 0.5646                                |
| 42 | Emphysema Distribution | Exacerbation Frequency | 0.3621             | 0.0167                            | 0.7624                                |
| 43 | Emphysema Distribution | Airway Wall Area       | 0.4888             | 0.2023                            | 0.0958                                |
| 44 | Emphysema              | Exacerbation Frequency | 0.7714             | 0.1161                            | 0.1067                                |
| 45 | Emphysema Distribution | Pack-years             | 0.8382             | 0.3054                            | 0.3293                                |

**Table S3:** p-values for all edges for non-Hispanic White (NHW) populations with 2 copies of COPD risk or COPD non-risk allele (FAM13A)

|    | Node 1                 | Node 2                 | Population PCOR | 2 copies COPD risk allele PCOR | 2 copies COPD non-risk allele PCOR | 2 copies COPD risk allele perm p-value | 2 copies COPD non-risk allele perm p-value |
|----|------------------------|------------------------|-----------------|--------------------------------|------------------------------------|----------------------------------------|--------------------------------------------|
| 1  | Emphysema              | Gas Trapping           | 0.6541          | 0.6935                         | 0.6667                             | 0.1582                                 | 0.2672                                     |
| 2  | FEV1 %pred             | Gas Trapping           | -0.3538         | -0.4507                        | -0.3717                            | 0.0372                                 | 0.0168                                     |
| 3  | FEV1 %pred             | Airway Wall Area       | -0.3200         | -0.3340                        | -0.3042                            | 0.3576                                 | 0.3838                                     |
| 4  | Gas Trapping           | Age                    | 0.2350          | 0.3146                         | 0.2269                             | 0.012                                  | 0.0116                                     |
| 5  | FEV1 %pred             | 6MWD                   | -0.2285         | 0.2401                         | 0.2429                             | 0.9614                                 | 0.929                                      |
| 6  | Gas Trapping           | BMI                    | -0.1982         | -0.2110                        | -0.1814                            | 0.3906                                 | 0.4062                                     |
| 7  | 6MWD                   | BMI                    | -0.1857         | -0.2343                        | -0.1919                            | 0.2402                                 | 0.3108                                     |
| 8  | Airway Wall Area       | 6MWD                   | 0.1840          | -0.1520                        | -0.1593                            | 0.775                                  | 0.9706                                     |
| 9  | Emphysema              | Airway Wall Area       | 0.1796          | -0.1311                        | -0.1558                            | 0.4606                                 | 0.693                                      |
| 10 | FEV1 %pred             | Exacerbation Frequency | -0.1408         | -0.1490                        | -0.1425                            | 0.6618                                 | 0.9754                                     |
| 11 | Age                    | Pack-years             | -0.1405         | 0.1012                         | 0.1392                             | 0.3126                                 | 0.257                                      |
| 12 | 6MWD                   | Pack-years             | -0.1316         | -0.1617                        | -0.1036                            | 0.1628                                 | 0.1662                                     |
| 13 | 6MWD                   | Age                    | -0.1151         | -0.1326                        | -0.1422                            | 0.732                                  | 0.8244                                     |
| 14 | FEV1 %pred             | Pack-years             | -0.1118         | -0.0895                        | -0.1480                            | 0.1456                                 | 0.1306                                     |
| 15 | FEV1 %pred             | BMI                    | -0.0911         | -0.0843                        | -0.1017                            | 0.5994                                 | 0.7146                                     |
| 16 | FEV1 %pred             | Age                    | -0.0758         | 0.1158                         | 0.0729                             | 0.2186                                 | 0.3072                                     |
| 17 | Exacerbation Frequency | 6MWD                   | -0.0742         | -0.1008                        | -0.0931                            | 0.8598                                 | 0.8658                                     |
| 18 | Emphysema              | Age                    | -0.0683         | -0.1446                        | -0.0389                            | 0.0032                                 | 0.0036                                     |
| 19 | FEV1 %pred             | Emphysema              | 0.0552          | -0.0064                        | -0.1232                            | 6.00E-04                               | 0.0006                                     |
| 20 | Exacerbation Frequency | Age                    | -0.0543         | -0.0876                        | -0.0937                            | 0.755                                  | 0.9728                                     |
| 21 | Emphysema              | Emphysema Distribution | 0.0500          | 0.0797                         | 0.0785                             | 0.9104                                 | 0.8252                                     |
| 22 | Emphysema              | BMI                    | 0.0492          | -0.0475                        | -0.0721                            | 0.4476                                 | 0.4946                                     |
| 23 | Airway Wall Area       | Exacerbation Frequency | -0.0485         | -0.0106                        | 0.1056                             | 0.1184                                 | 0.0138                                     |
| 24 | Emphysema Distribution | Gas Trapping           | -0.0474         | -0.0604                        | -0.0751                            | 0.6136                                 | 0.7288                                     |
| 25 | Gas Trapping           | Pack-years             | -0.0464         | 0.0617                         | 0.1055                             | 0.308                                  | 0.2432                                     |
| 26 | Emphysema Distribution | 6MWD                   | 0.0447          | -0.0397                        | -0.0659                            | 0.448                                  | 0.3946                                     |
| 27 | Emphysema              | Pack-years             | 0.0427          | -0.0544                        | -0.0943                            | 0.3566                                 | 0.2718                                     |
| 28 | BMI                    | Age                    | -0.0419         | 0.0107                         | 0.0033                             | 0.8014                                 | 0.2414                                     |
| 29 | Emphysema              | 6MWD                   | 0.0408          | -0.0416                        | -0.0657                            | 0.4936                                 | 0.5466                                     |
| 30 | Gas Trapping           | Exacerbation Frequency | -0.0353         | 0.0184                         | 0.1011                             | 0.08                                   | 0.0578                                     |
| 31 | Gas Trapping           | Airway Wall Area       | -0.0353         | -0.0411                        | -0.0355                            | 0.812                                  | 0.9528                                     |
| 32 | Emphysema Distribution | Age                    | 0.0324          | -0.0119                        | -0.0485                            | 0.3126                                 | 0.2676                                     |
| 33 | Airway Wall Area       | Pack-years             | -0.0314         | -0.0149                        | -0.0021                            | 0.9902                                 | 0.132                                      |
| 34 | Emphysema Distribution | BMI                    | -0.0300         | -0.0606                        | -0.0550                            | 0.8802                                 | 0.8502                                     |
| 35 | FEV1 %pred             | Emphysema Distribution | 0.0266          | -0.0157                        | -0.0372                            | 0.5556                                 | 0.5866                                     |
| 36 | BMI                    | Pack-years             | 0.0248          | 0.0686                         | 0.0516                             | 0.7038                                 | 0.6188                                     |
| 37 | Airway Wall Area       | BMI                    | -0.0238         | 0.0131                         | -0.0385                            | 0.7652                                 | 0.2676                                     |
| 38 | Exacerbation Frequency | BMI                    | -0.0184         | 0.0224                         | 0.0107                             | 0.8322                                 | 0.6014                                     |
| 39 | Exacerbation Frequency | Pack-years             | -0.0158         | -0.0071                        | -0.0355                            | 0.3584                                 | 0.4616                                     |
| 40 | Gas Trapping           | 6MWD                   | 0.0142          | -0.0281                        | 0.0109                             | 0.3052                                 | 0.8064                                     |
| 41 | Airway Wall Area       | Age                    | 0.0128          | -0.0148                        | -0.0161                            | 0.835                                  | 0.8718                                     |
| 42 | Emphysema Distribution | Exacerbation Frequency | -0.0101         | 0.0651                         | -0.0085                            | 0.1666                                 | 0.2312                                     |
| 43 | Emphysema Distribution | Airway Wall Area       | -0.0077         | 0.0347                         | 0.0466                             | 0.8472                                 | 0.6508                                     |
| 44 | Emphysema              | Exacerbation Frequency | 0.0032          | 0.0428                         | -0.0451                            | 0.1906                                 | 0.1876                                     |
| 45 | Emphysema Distribution | Pack-years             | -0.0023         | 0.0279                         | 0.0273                             | 0.987                                  | 0.9792                                     |

**Table S3 (cont.):** partial correlations and permutation-based p-values for all edges for non-Hispanic White (NHW) populations with 2 copies of COPD risk or COPD non-risk allele (FAM13A)
