# Supplementary material for: Analyzing networks of phenotypes in complex diseases: methodology and applications in COPD
Source: PubMed Central journal article supplement (PMC4105829; doi:10.1186/1752-0509-8-78), 2014-06-25
Supplement: 1752-0509-8-78-S5.pdf [file 1752-0509-8-78-S5.pdf]

| Node 1                 | Node 2                 | COPDGene<br>P-value | COPDGene<br>PCOR | ECLIPSE<br>P-value | ECLIPSE<br>PCOR |
|------------------------|------------------------|---------------------|------------------|--------------------|-----------------|
| FEV1%PRED              | Emphysema              | 5.40E-164           | -0.4769          | 7.24E-79           | -0.4337         |
| FEV1%PRED              | 6MWD                   | 2.40E-72            | 0.3257           | 5.65E-24           | 0.2415          |
| FEV1%PRED              | Airway Wall Area       | 1.67E-65            | -0.3103          | 2.77E-15           | -0.19           |
| Emphysema              | Airway Wall Area       | 3.07E-60            | -0.2978          | 7.53E-19           | -0.2128         |
| Emphysema              | Age                    | 1.58E-46            | 0.2619           | 9.24E-10           | 0.1478          |
| Emphysema              | BMI                    | 1.54E-41            | -0.2474          | 0.0168             | -0.058          |
| 6MWD                   | BMI                    | 2.00E-22            | -0.1799          | 1.60E-10           | -0.1543         |
| Age                    | Pack-years             | 2.23E-22            | 0.1797           | 9.61E-09           | 0.1386          |
| Airway Wall Area       | 6MWD                   | 4.97E-10            | -0.1154          | 7.48E-05           | -0.0959         |
| FEV1%PRED              | Exacerbation Frequency | 3.75E-08            | -0.1022          | 6.12E-06           | -0.1094         |
| 6MWD                   | Age                    | 3.83E-07            | -0.0943          | 9.00E-10           | -0.1479         |
| Exacerbation Frequency | 6MWD                   | 2.17E-06            | -0.088           | 2.11E-06           | -0.1147         |
| FEV1%PRED              | BMI                    | 3.51E-06            | 0.0862           | 3.14E-11           | 0.1602          |
| Exacerbation Frequency | Age                    | 5.41E-06            | -0.0845          | 0.3529             | -0.0226         |
| 6MWD                   | Pack-years             | 0.0006              | -0.064           | 0.2428             | -0.0284         |
| Emphysema              | Exacerbation Frequency | 0.0015              | 0.059            | 0.3183             | 0.0242          |
| Airway Wall Area       | Exacerbation Frequency | 0.002               | 0.0573           | 0.2788             | -0.0263         |
| FEV1%PRED              | Age                    | 0.0023              | 0.0567           | 3.39E-09           | 0.1428          |
| BMI                    | Age                    | 0.0223              | 0.0425           | 0.1398             | -0.0358         |
| Emphysema              | Pack-years             | 0.0419              | 0.0378           | 0.1627             | 0.0339          |
| Airway Wall Area       | BMI                    | 0.054               | 0.0359           | 1.04E-29           | 0.2697          |
| Exacerbation Frequency | BMI                    | 0.0635              | 0.0345           | 0.6702             | -0.0103         |
| BMI                    | Pack-years             | 0.0718              | 0.0335           | 0.0039             | 0.07            |
| Emphysema              | 6MWD                   | 0.3311              | -0.0181          | 0.0012             | -0.0784         |
| Exacerbation Frequency | Pack-years             | 0.3314              | -0.018           | 0.101              | -0.0398         |
| FEV1%PRED              | Pack-years             | 0.3545              | -0.0172          | 0.036              | -0.0509         |
| Airway Wall Area       | Age                    | 0.5199              | -0.012           | 0.4327             | 0.019           |
| Airway Wall Area       | Pack-years             | 0.6522              | 0.0084           | 0.0144             | 0.0594          |

**Table S4:** p-values and partial correlations for all edges in COPDGene and ECLIPSE for all cases
