# Supplementary material for: Analyzing networks of phenotypes in complex diseases: methodology and applications in COPD
Source: PubMed Central journal article supplement (PMC4105829; doi:10.1186/1752-0509-8-78), 2014-06-25
Supplement: 1752-0509-8-78-S6.pdf [file 1752-0509-8-78-S6.pdf]

| Node 1                 | Node 2                 | COPDGene<br>P-value | COPDGene<br>PCOR | ECLIPSE<br>P-value | ECLIPSE<br>PCOR |
|------------------------|------------------------|---------------------|------------------|--------------------|-----------------|
| FEV1%PRED              | Emphysema              | 3.60E-127           | -0.4745          | 7.70E-77           | -0.433          |
| FEV1%PRED              | 6MWD                   | 3.52E-75            | 0.3723           | 5.26E-23           | 0.239           |
| FEV1%PRED              | Airway Wall Area       | 2.77E-55            | -0.321           | 9.99E-15           | -0.1883         |
| Emphysema              | Airway Wall Area       | 1.62E-46            | -0.2948          | 3.00E-18           | -0.2115         |
| Emphysema              | Age                    | 3.33E-32            | 0.2449           | 3.87E-09           | 0.1439          |
| Emphysema              | BMI                    | 3.02E-31            | -0.2412          | 0.0224             | -0.056          |
| 6MWD                   | BMI                    | 3.45E-22            | -0.2019          | 3.17E-10           | -0.1535         |
| 6MWD                   | Age                    | 3.44E-14            | -0.1586          | 7.95E-10           | -0.1501         |
| Age                    | Pack-years             | 1.53E-09            | 0.1267           | 4.41E-08           | 0.1338          |
| 6MWD                   | Pack-years             | 2.68E-09            | -0.1248          | 0.3976             | -0.0208         |
| Exacerbation Frequency | Age                    | 7.16E-09            | -0.1214          | 0.2433             | -0.0286         |
| FEV1%PRED              | BMI                    | 4.22E-07            | 0.1062           | 2.02E-10           | 0.1552          |
| Airway Wall Area       | 6MWD                   | 1.06E-06            | -0.1025          | 5.13E-05           | -0.0992         |
| Exacerbation Frequency | 6MWD                   | 1.36E-06            | -0.1015          | 4.45E-07           | -0.1235         |
| FEV1%PRED              | Age                    | 3.24E-06            | 0.0978           | 1.03E-07           | 0.1301          |
| FEV1%PRED              | Exacerbation Frequency | 4.77E-06            | -0.0961          | 1.95E-05           | -0.1046         |
| Airway Wall Area       | Exacerbation Frequency | 0.0075              | 0.0562           | 0.2712             | -0.027          |
| Emphysema              | Exacerbation Frequency | 0.0084              | 0.0554           | 0.254              | 0.028           |
| Emphysema              | Pack-years             | 0.041               | 0.043            | 0.147              | 0.0356          |
| BMI                    | Pack-years             | 0.1714              | 0.0288           | 0.0025             | 0.074           |
| Exacerbation Frequency | Pack-years             | 0.1826              | -0.0281          | 0.1256             | -0.0376         |
| Airway Wall Area       | Age                    | 0.3358              | 0.0203           | 0.4524             | 0.0184          |
| BMI                    | Age                    | 0.3373              | 0.0202           | 0.0944             | -0.0411         |
| Exacerbation Frequency | BMI                    | 0.3889              | 0.0181           | 0.3743             | -0.0218         |
| Airway Wall Area       | BMI                    | 0.446               | 0.016            | 8.49E-30           | 0.2731          |
| Airway Wall Area       | Pack-years             | 0.544               | 0.0127           | 0.0202             | 0.057           |
| Emphysema              | 6MWD                   | 0.5888              | 0.0114           | 0.0011             | -0.0802         |
| FEV1%PRED              | Pack-years             | 0.9407              | -0.0016          | 0.01945            | -0.0573         |

**Table S5:** p-values and partial correlations for all edges in COPDGene and ECLIPSE for all white cases
