# Supplementary material for: Analyzing networks of phenotypes in complex diseases: methodology and applications in COPD
Source: PubMed Central journal article supplement (PMC4105829; doi:10.1186/1752-0509-8-78), 2014-06-25

**ECLIPSE network,  $p < 0.001$ , all cases**

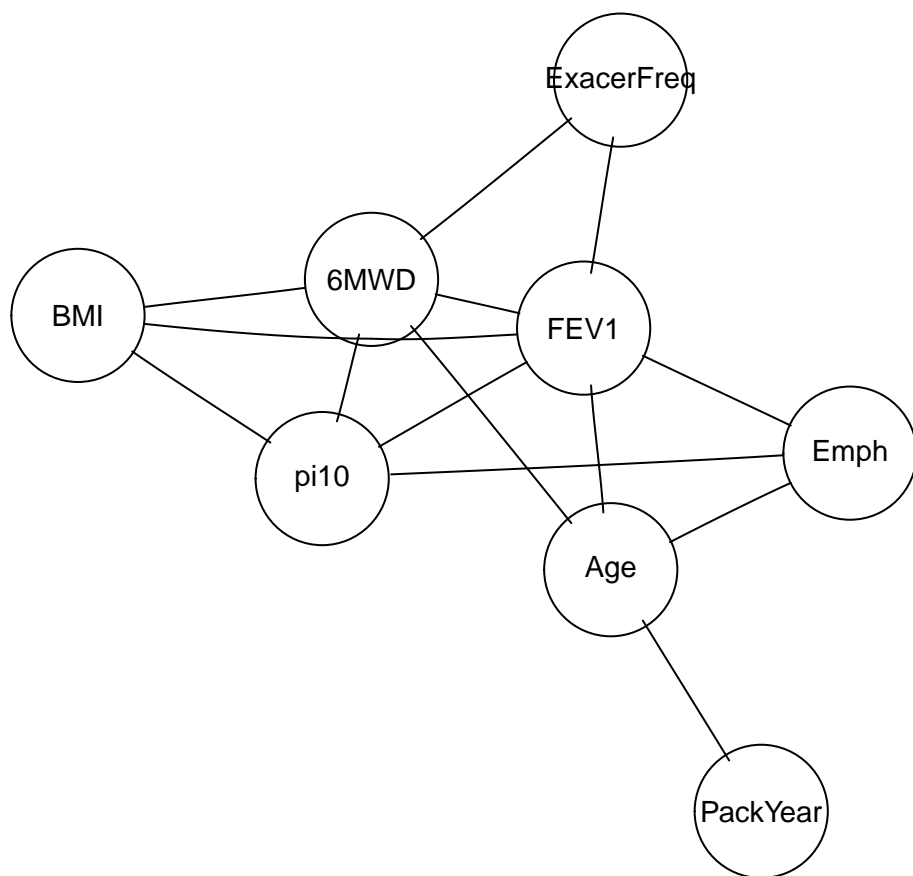

**ECLIPSE network,  $p < 0.001$ , white cases**

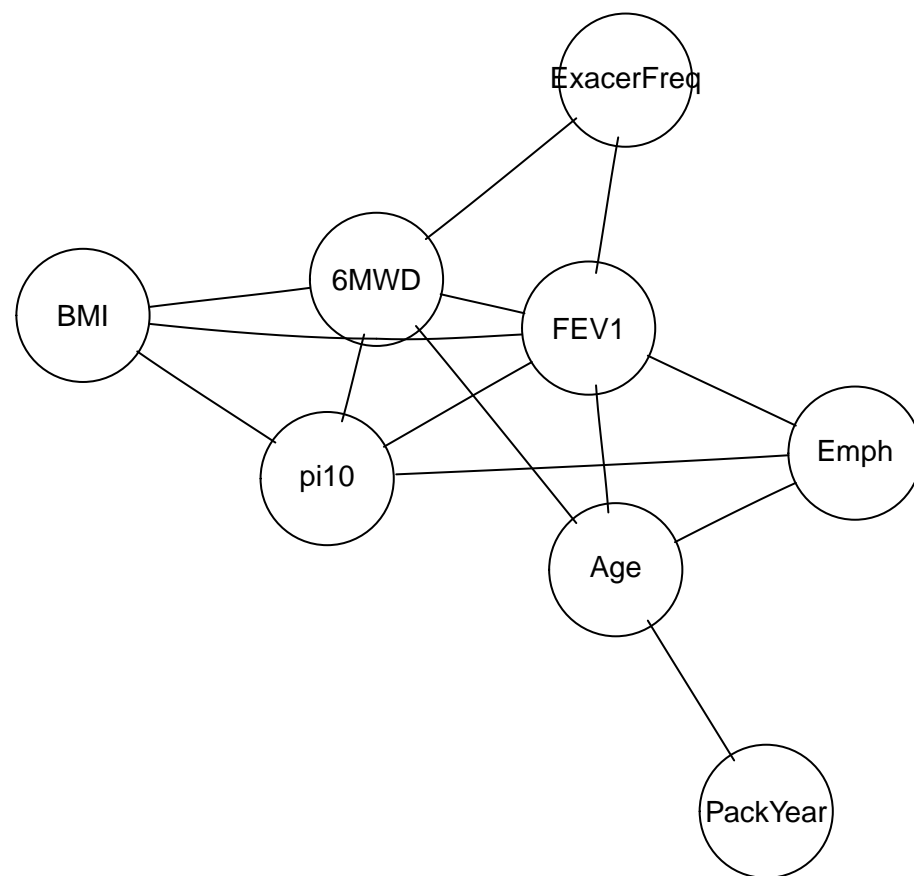

**COPDGene Network,  $p < 0.001$ , all cases**

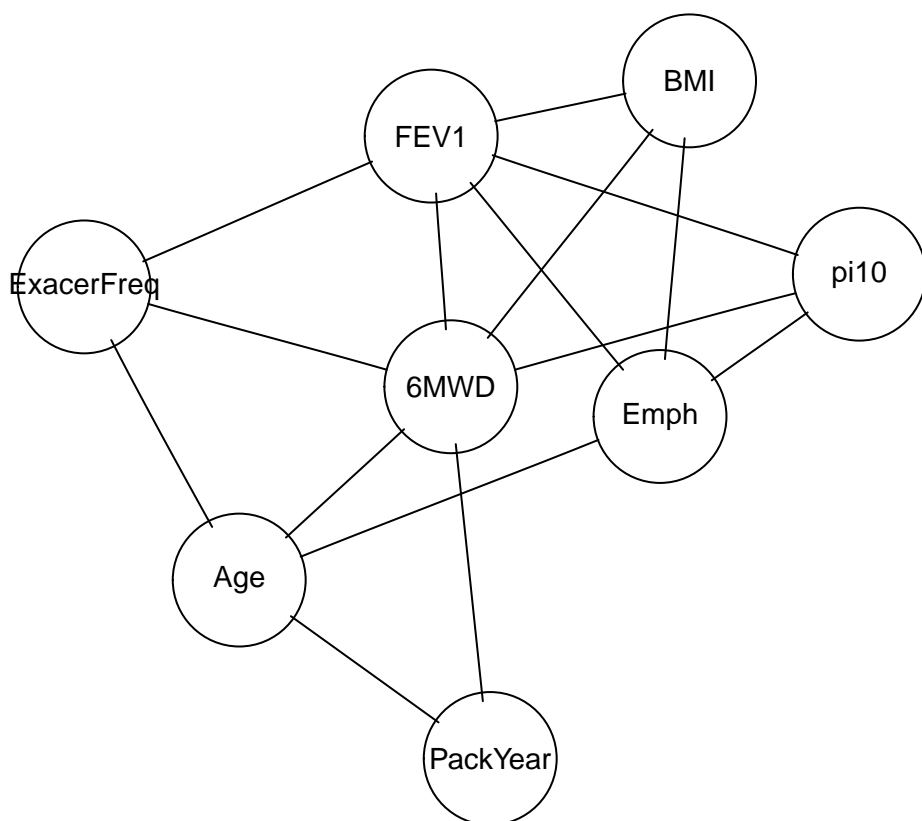

**COPDGene Network,  $p < 0.001$ , white cases**

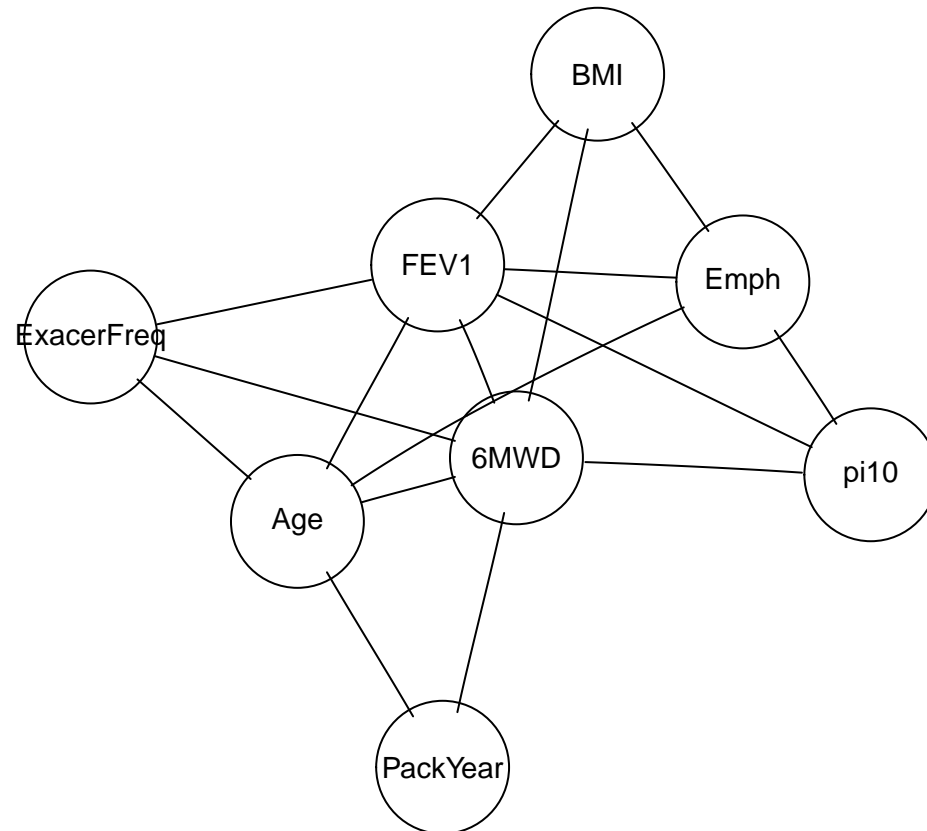

Supplement: 1752-0509-8-78-S7.pdf [file 1752-0509-8-78-S7.pdf]
